# Supplementary material
Source: PubMed Central journal article supplement (PMC7798026)

Figure S1. Transfection efficiency was confirmed using reverse transcription-quantitative PCR. (A) miR-665 mimic significantly promoted the expression of miR-665. (B) miR-665 mimic significantly inhibited the expression of HMGB1 mRNA, pcDNA3.1-*HMGB1* promoted the expression of HMGB1 mRNA. \*\*\* $P < 0.001$  vs. untreated cells. miR, microRNA; NC, negative control; HMGB1, high mobility group box 1.

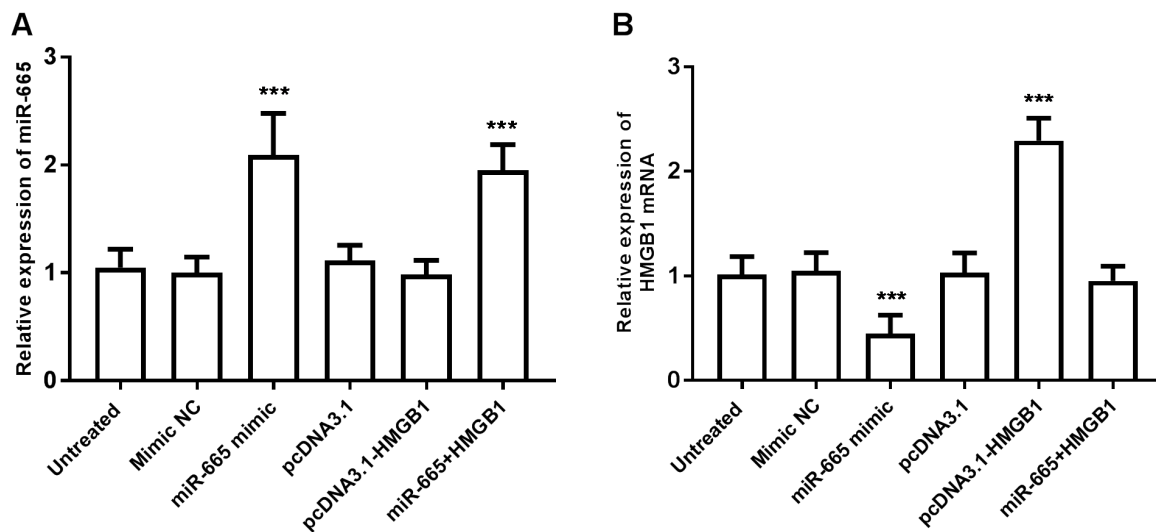

Supplement: Supplementary_Data.pdf [file Supplementary_Data.pdf]
